# Supplementary material for: Supercritical methanol depolymerization and hydrodeoxygenation of lignin and biomass over reduced copper porous metal oxides
Source: Royal Society of Chemistry journal article supplement (doi:10.1039/c9gc00589g), 2019-01-01
Supplement: c9gc00589g1.pdf [file c9gc00589g1.pdf]

Supercritical Methanol Depolymerization and Hydrodeoxygenation  
of Lignin and Biomass over Reduced Copper Porous Metal Oxides

Daniel J. McClelland<sup>a</sup>, Peter H. Galebach<sup>a</sup>, Ali Hussain Motagamwala<sup>a,b</sup>, Ashley M. Wittrig<sup>c</sup>,  
Steven D. Karlen<sup>b,d</sup>, J. Scott Buchanan<sup>c</sup>, James A. Dumesic<sup>a,b</sup>, and George W. Huber<sup>\*a</sup>

<sup>a</sup> Department of Chemical and Biological Engineering, University of Wisconsin-Madison,  
Madison, WI, USA. Email: gwhuber@wisc.edu

<sup>b</sup> Great Lakes Bioenergy Research Center, Wisconsin Energy Institute, Madison, WI, USA

<sup>c</sup> ExxonMobil Research and Engineering, Annandale, NJ, USA

<sup>d</sup> Department of Biochemistry, University of Wisconsin-Madison, Madison, WI, USA

## Supplementary Information

Table S1. Lignin fraction carbon yields of 15 and 30 min from SCM-DHDO experiments with maple wood and GVL extracted lignin. Dimer and trimer yields were estimated for the 15 min time-point using a high-temperature GC-FID.

| Feed                      | Carbon yield from lignin fraction (%) |                      |            |                      |
|---------------------------|---------------------------------------|----------------------|------------|----------------------|
|                           | Maple Wood                            | GVL extracted lignin | Maple Wood | GVL extracted lignin |
|                           | 15 min                                | 15 min               | 30 min     | 30 min               |
| Guaiacol                  | 0.8                                   | 0.1                  | 0.9        | 0.2                  |
| 4-Ethylphenol             | 1.5                                   | 0.1                  | 1.4        | 0.3                  |
| 4-Methylguaiacol          | 1.5                                   | 0.2                  | 1.4        | 0.5                  |
| 4-Ethylguaiacol           | 1.4                                   | 0.5                  | 1.2        | 0.9                  |
| 4-Propylphenol            | 1.4                                   | 0.0                  | 1.2        | 0.0                  |
| 4-Propylguaiacol          | 6.3                                   | 0.8                  | 5.7        | 1.3                  |
| 4-Methylsyringol          | 0.8                                   | 0.2                  | 0.8        | 0.4                  |
| 4-Ethylsyringol           | 0.8                                   | 0.3                  | 0.9        | 0.5                  |
| 4-Propylsyringol          | 0.8                                   | 1.1                  | 1.3        | 0.9                  |
| By type                   |                                       |                      |            |                      |
| Syringols                 | 2.4                                   | 1.6                  | 3.1        | 1.8                  |
| Guaiacols                 | 10.1                                  | 1.7                  | 9.2        | 3.0                  |
| Phenols                   | 2.9                                   | 0.1                  | 2.6        | 0.3                  |
| By alkyl tail length      |                                       |                      |            |                      |
| No tail (C <sub>0</sub> ) | 0.8                                   | 0.1                  | 0.9        | 0.2                  |

|                                                                                        |                 |                 |                 |                 |
|----------------------------------------------------------------------------------------|-----------------|-----------------|-----------------|-----------------|
| Methyl tail (C <sub>1</sub> )                                                          | 2.3             | 0.4             | 2.2             | 0.9             |
| Ethyl tail (C <sub>2</sub> )                                                           | 3.7             | 1.0             | 3.6             | 1.7             |
| Propyl tail (C <sub>3</sub> )                                                          | 8.6             | 1.9             | 8.2             | 2.2             |
| Unidentified aromatics                                                                 | 0               | 0.6             | 0               | 3.0             |
| Unidentified cyclohexanols                                                             | 0               | 0.0             | 0               | 0.0             |
| Total monomers                                                                         | 15.4            | 4.1             | 15.0            | 8.1             |
| S/G/P ratio                                                                            | 1.0/4.2/1.2     | 1.0/1.0/0.1     | 1.0/2.9/0.8     | 1.0/1.6/0.2     |
| Alkyl tail length ratio C <sub>0</sub> /C <sub>1</sub> /C <sub>2</sub> /C <sub>3</sub> | 0.1/0.3/0.4/1.0 | 0.1/0.2/0.5/1.0 | 0.1/0.3/0.4/1.0 | 0.1/0.4/0.8/1.0 |
| Estimated dimer yield                                                                  | 0.0             | 2.3             | Not measured    | Not measured    |
| Estimated trimer yield                                                                 | 0.0             | 0.0             | Not measured    | Not measured    |
